# Supplementary material for: Crystal plane effects of nano-CeO2 on its antioxidant activity
Source: Royal Society of Chemistry journal article supplement (doi:10.1039/c4ra06214k), 2014-01-01
Supplement: c4ra06214k1.pdf [file c4ra06214k1.pdf]

Electronic Supplementary Information

**Crystal Plane Effects of Nano-CeO<sub>2</sub> on its Antioxidant  
Activity**

**Yan Zhang<sup>a</sup>, Kebin Zhou<sup>a</sup>, Yanwu Zhai<sup>a</sup>, Fei Qin<sup>a</sup>, Lulu Pan<sup>b</sup> and Xin Yao<sup>a\*</sup>**

<sup>a</sup> School of Chemistry and Chemical Engineering, University of Chinese  
Academy of Sciences, Beijing, China. Tel: 86-10-88256980;

E-mail: [yaox@ucas.ac.cn](mailto:yaox@ucas.ac.cn)

<sup>b</sup> Beijing ENTE Century Environmental Technology Co., Beijing, China.

## 1. Surface area of all the samples

Table 1 the specific surface area of nano-CeO<sub>2</sub> with different morphology

| materials                              | nanoparticles | nanobars | Nanowires |
|----------------------------------------|---------------|----------|-----------|
| ssa/(m <sup>2</sup> ·g <sup>-1</sup> ) | 51.3          | 99.4     | 102.9     |

## 2. Comparison of nanobars and nanowires in the morphology

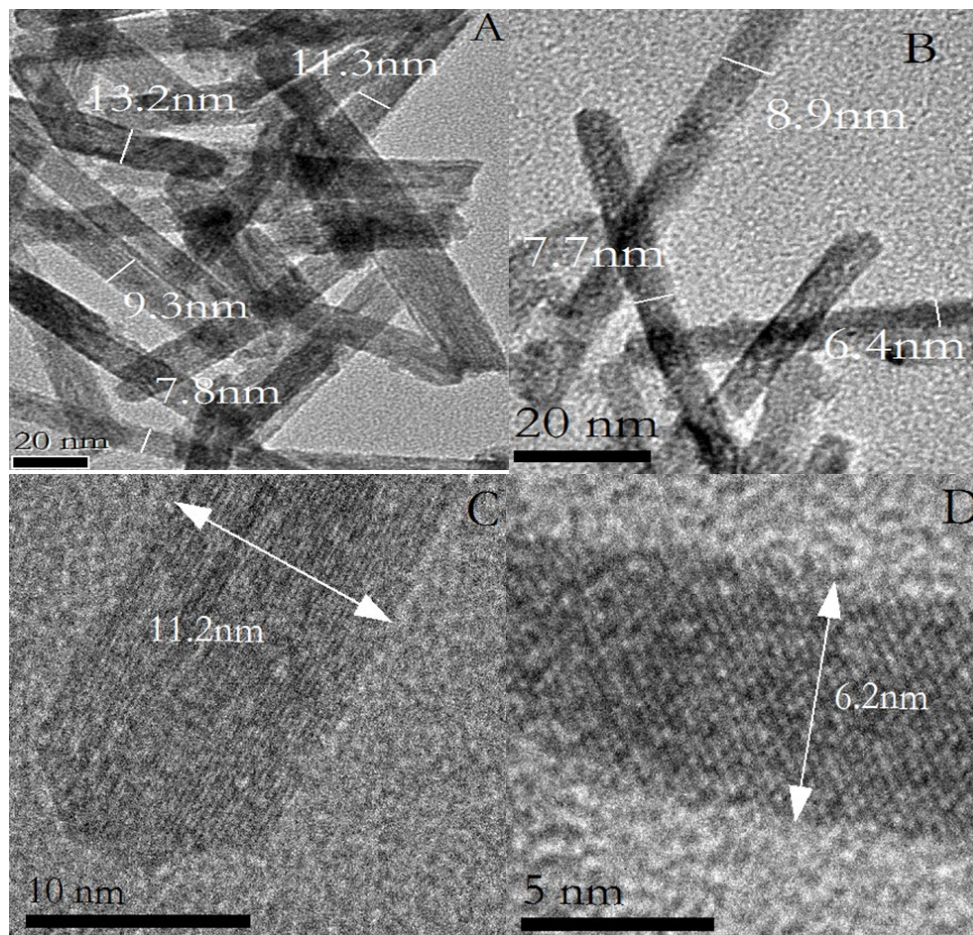

Fig. 1 TEM and HRTEM of nanobars (A and C) and nanowires (B and D)

## 3. Temperature-programmed reduction

The result in the whole range of temperature shows as follows:

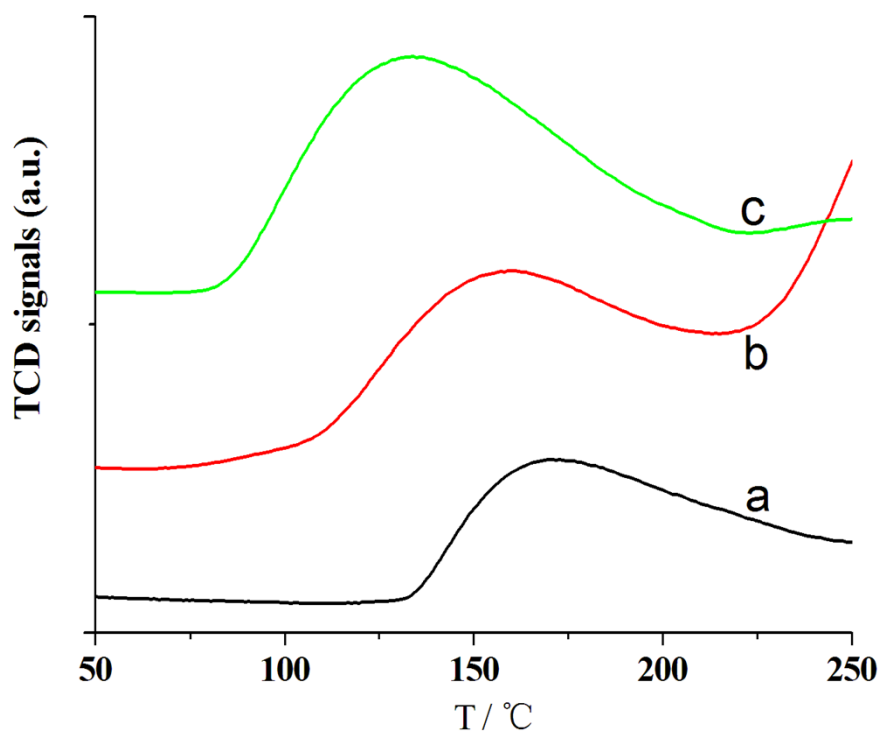

**Fig. 2** CO Temperature-programmed reduction profiles of nano-CeO<sub>2</sub> with different morphologies. Considering the condition of the SWV scan experiment, we selected the temperature range from 50°C to 280°C, in which the reduction of Ce<sup>4+</sup> only occurred on the surface of the materials.

#### **4. The contents of Ce<sup>3+</sup> on the surface of nano-CeO<sub>2</sub>**

The Ce 3d spectra are composed of two multiplets (v and u) corresponding to the spin-orbit splitting of 3d<sub>5/2</sub> and 3d<sub>3/2</sub> core holes.<sup>1</sup> Each spin-orbit component of Ce<sup>3+</sup> is dominated by four components: peaks u' and v' are respectively located at 904.3±0.1eV and 886.1±0.1eV; peaks u<sub>0</sub> and v<sub>0</sub> are respectively located at 899.9±0.1eV and 881.8±0.1eV. For Ce<sup>4+</sup> states, each spin-orbit component is dominated by other six components (v + v'' + v''' + u + u'' + u''').<sup>2</sup> The peak area can be

obtained by the PeakFit 4.0 software, and the ratio of  $Ce^{3+}/Ce^{4+}$  can be calculated from the following equations:<sup>3</sup>

$$A_{Ce^{3+}} = A_{v0} + A_{v'} + A_{u0} + A_u$$

$$A_{Ce^{4+}} = A_v + A_{v''} + A_{v'''} + A_u + A_{u''} + A_{u'''}$$

$$C_{Ce^{3+}} = \frac{A_{Ce^{3+}}}{A_{Ce^{4+}} + A_{Ce^{3+}}}$$

## 5. Morphology of nano-CeO<sub>2</sub> materials after the SWV experiment

In order to explore the morphology and crystal planes of nano-CeO<sub>2</sub> after the antioxidant process, we examined the morphology of nanobars by TEM after antioxidant reaction in pH 7.4 Tis-HCl solution. Nano-CeO<sub>2</sub> was added to pH 7.4 Tis-HCl and then redundant H<sub>2</sub>O<sub>2</sub> was added. After ultrasonic process, the materials were washed with ultrapure water and alcohol for 3 times separately. The TEM result shows as Fig. 3.

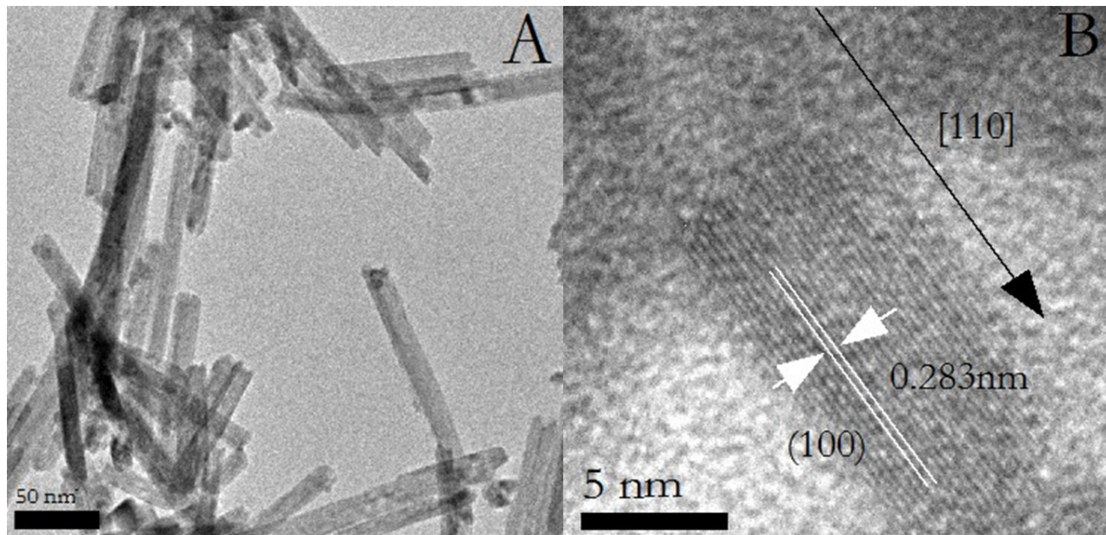

**Fig. 3** TEM (A) and HRTEM (B) of nanobars after SWV

**Preference**

1. A. Fujimori, *Phys. Rev. B*, 1983, **28**, 4489-4499.
2. C. Anandan and P. Bera, *Appl. Surf. Sci.*, 2013, **283**, 297-303.
3. E. Beche, G. Peraudeau, V. Flaud and D. Perarnau, *Surf. Interface Anal.*, 2012, **44**, 1045-1050.
